# Supplementary material for: Exploring Hepatocellular Carcinoma Mortality Using Weighted Regression Estimation for the Cohort Effect in Taiwan from 1976 to 2015
Source: MDPI journal article supplement (doi:10.3390/ijerph19095573), 2022-05-04
Supplement: s1 [file s1]

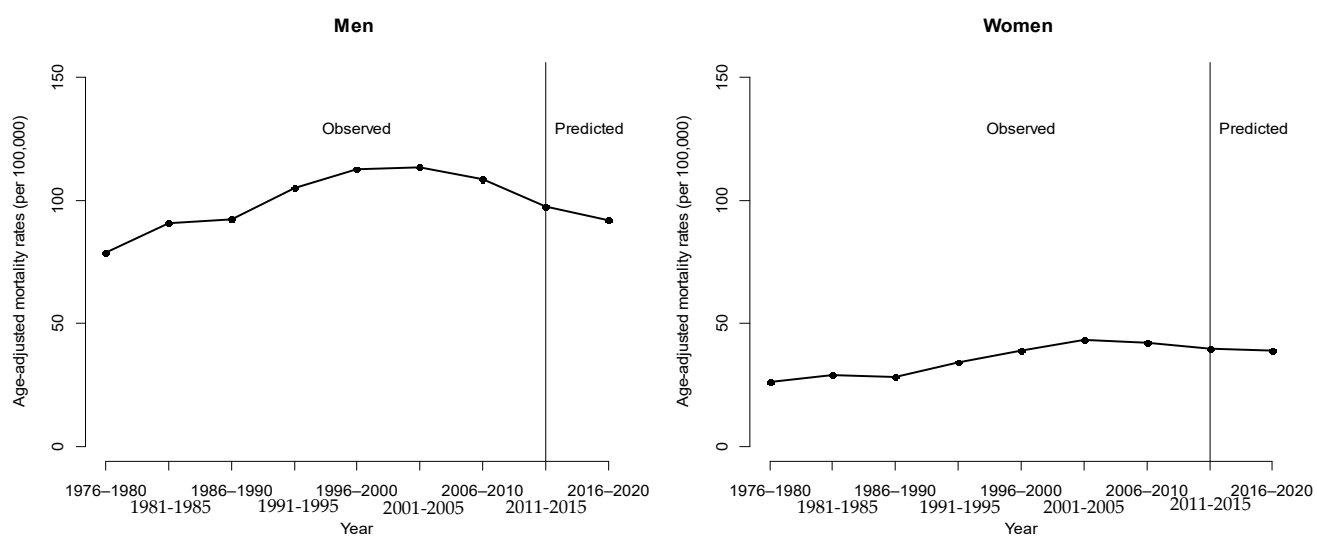

**Figure S1.** Observation and prediction of age-adjusted mortality in HCC for men and women in Taiwan.
